# Supplementary material for: Prediction of the Clinical Outcomes of Sigmoid Volvulus by Abdominal X-Ray: AXIS Classification System
Source: Hindawi journal article supplement (doi:10.1155/2018/8493235), 2018-11-15
Supplement: f1 [file 8493235.f1.pdf]

Supplementary Table 1. Associated factors for the deviation of axis in patients underwent surgery (N=14).

|                                      | AXIS classification |                     |                     | P for trend    |
|--------------------------------------|---------------------|---------------------|---------------------|----------------|
|                                      | Group A<br>n =5 (%) | Group B<br>n =6 (%) | Group C<br>n =3 (%) |                |
| Time after onset (day)               |                     |                     |                     | 0.06           |
| 0                                    | 2(40)               | 3(50)               | 0                   |                |
| 1                                    | 2(40)               | 2(33.3)             | 0                   |                |
| 2                                    | 1(20)               | 1(16.7)             | 1(33.3)             |                |
| 3                                    | 0                   | 0                   | 1(33.3)             |                |
| 6                                    | 0                   | 0                   | 1(33.3)             |                |
| Surgical history, no                 | 5(100)              | 6(100)              | 3(100)              | Not applicable |
| yes                                  | 0                   | 0                   | 0                   |                |
| Past history of sigmoid volvulus, no | 5(100)              | 6(100)              | 3(100)              | Not applicable |
| yes                                  | 0                   | 0                   | 0                   |                |

Surgical history and a past history of sigmoid volvulus were not associated with AXIS classification, and time after onset was marginally associated with more severe AXIS classification.
